# Supplementary material for: Portable smartphone platform based on Ti3C2 MQDs/CDs assembly for ratiometric fluorescence quantitative monitoring of crystal violet
Source: Royal Society of Chemistry journal article supplement (doi:10.1039/d3ay01549a), 2023-01-01
Supplement: d3ay01549a1.pdf [file d3ay01549a1.pdf]

## Supplementary Material for

Portable smartphone platform based on  $\text{Ti}_3\text{C}_2$  MQDs/CDs assembly for  
ratiometric fluorescence quantitative monitoring of crystal violet

Yuxuan Bai<sup>1,#</sup>, Mingwang Liu<sup>1,#</sup>, Yu He<sup>1\*</sup>, Gongwu Song<sup>1</sup>

1. Hubei Collaborative Innovation Center for Advanced Organic Chemical  
Materials, Ministry-of-Education Key Laboratory for the Synthesis and  
Application of Organic Functional Molecules, College of Chemistry and  
Chemical Engineering, Hubei University, Wuhan 430062, China.

<sup>#</sup>These authors contributed equally.

\* Corresponding author: E-mail address: [heyu@hubu.edu.cn](mailto:heyu@hubu.edu.cn)

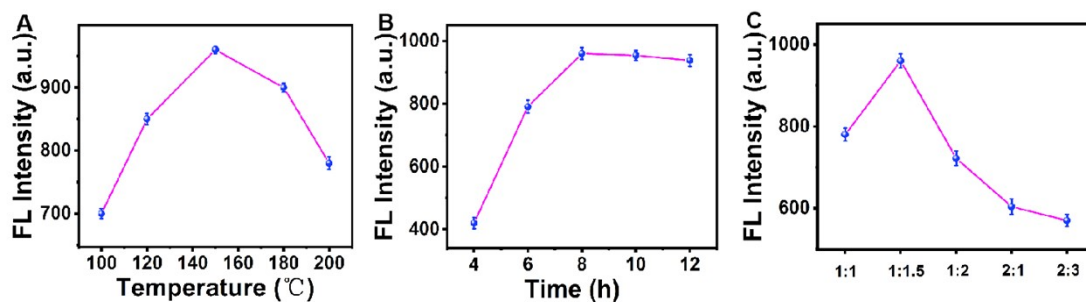

Fig. S1. Optimization of CDs synthesis conditions: (A) reaction temperature, (B) reaction time and (C) ratio of substances of 4-chloro-1,2-diaminobenzene to 3-hydroxytyramine hydrochloride.

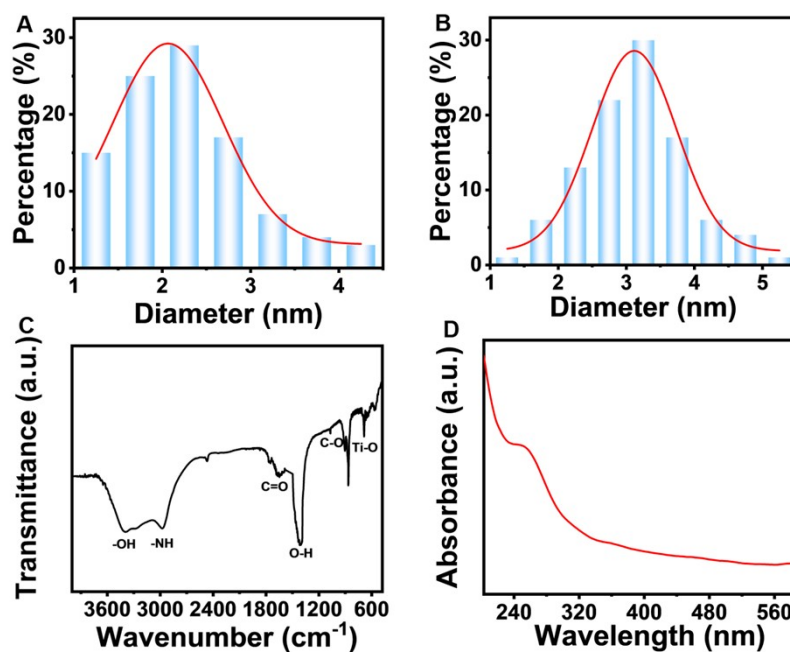

Fig. S2. The size distribution of (A) Ti<sub>3</sub>C<sub>2</sub> MQDs and (B) CDs, (C) FT-IR spectrum and (D) UV-vis absorption spectra of Ti<sub>3</sub>C<sub>2</sub> MQDs.

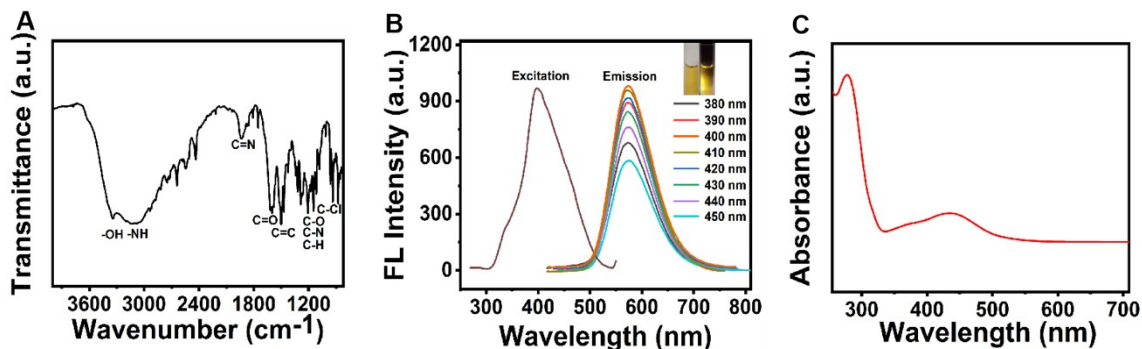

Fig. S3. (A) FT-IR spectrum, (B) fluorescence spectra and (C) UV-vis absorption spectra of CDs.

### 1. The narrow-scan spectra of C, N, Ti in $Ti_3C_2$ MQDs

Specifically, the XPS spectra of C 1s (Fig. S3A) display the peaks for C=C /C-C (284.8 eV), C-O (286.33 eV), C=O (287.05 eV) and N-C=N (288.9 eV). As for the N 1s spectrum (Fig. S3B), the peaks centered at 398.89, 399.63 and 401.56 eV belong to C-N-C, N-(C)<sub>3</sub> and N-H, respectively. As shown in Fig. S3C, the peaks at 458.1, 461.43, 464.94 eV and 468.29 eV correspond to Ti-C 2p<sub>3/2</sub>, Ti-O 2p<sub>3/2</sub>, Ti-O 2p<sub>1/2</sub> and Ti-C 2p<sub>1/2</sub>, respectively, indicating that the synthesized  $Ti_3C_2$  MQDs possess typical characteristic peaks.

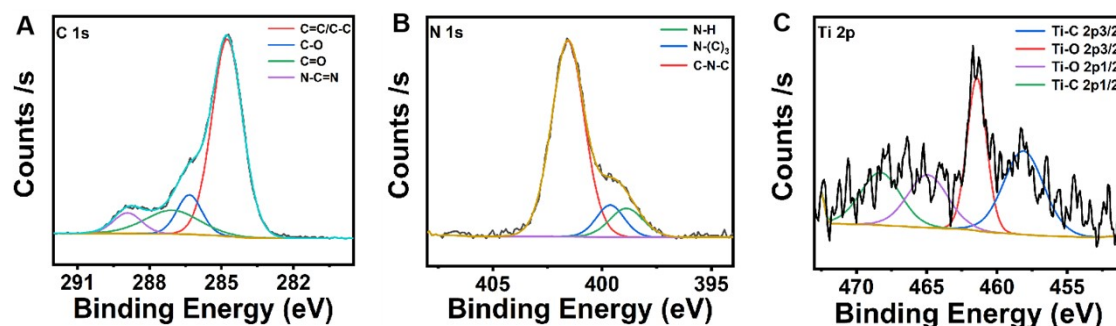

Fig. S4. The high-resolution XPS spectra of (A) C 1s, (B) N 1s, (C) Ti 2p of the  $Ti_3C_2$  MQDs.

### 2. The narrow-scan spectra of C, N, Cl in CDs

As for CDs, further analysis by high-resolution XPS shows that C 1s contains three fitting peaks of 284.8 eV, 285.3 eV and 286.6 eV, which belong to C=C, C-C and C-O, respectively. The peaks of N 1s at 398.8 eV, 399.52 eV and 402.1 eV correspond

to N-C N-(C)<sub>3</sub> and N-H, respectively. The Cl 2p XPS spectrum contains three peaks, which are 196.2 eV (Cl 2p<sub>3/2</sub>) 199.4 eV (Cl 2p) and 201.41 eV (Cl 2p<sub>1/2</sub>) respectively.

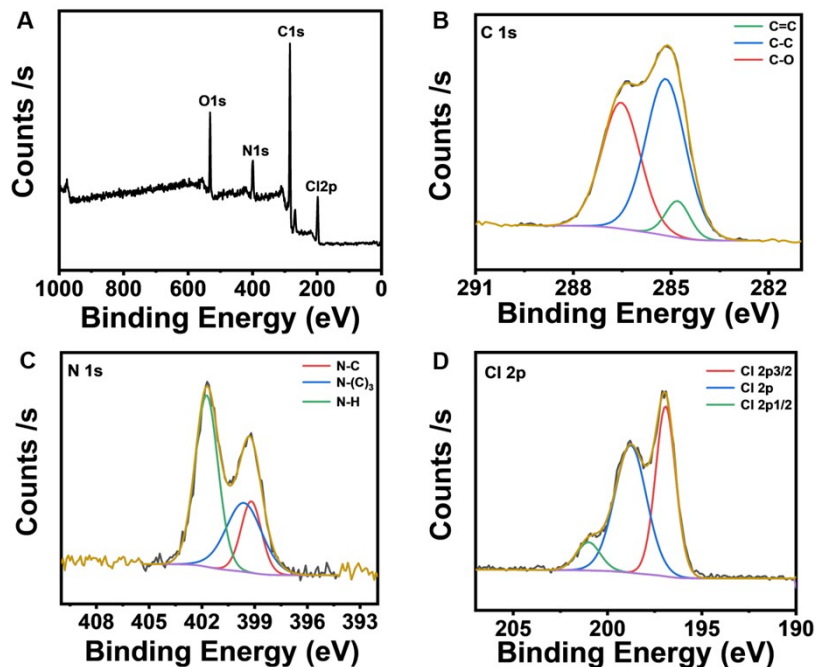

Fig. S5. (A) XPS full spectrum of CDs. The high-resolution XPS spectra of (B) C 1s, (C) N 1s, (D) Cl 2p of the CDs.

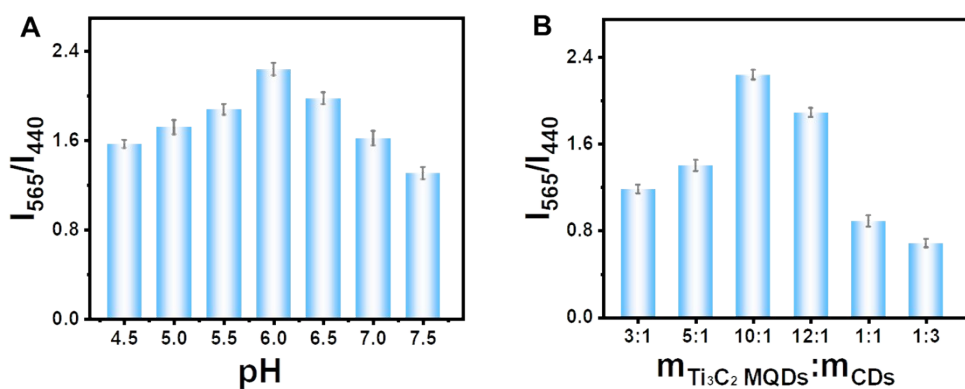

Fig. S6. The effects of (A) pH and (B) coupling mass ratio of Ti<sub>3</sub>C<sub>2</sub> MQDs/CDs.

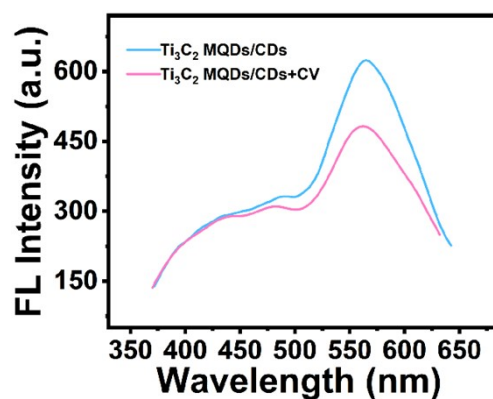

Fig. S7. Feasibility of CV detection with  $\text{Ti}_3\text{C}_2$  MQDs/CDs probe

**Table S1** Fitting fluorescence lifetime parameters for  $\text{Ti}_3\text{C}_2$  MQDs/CDs

| Sample | Nanomaterial                                                     | Fluorescence lifetime $\tau$ (ns) |
|--------|------------------------------------------------------------------|-----------------------------------|
| 1      | $\text{Ti}_3\text{C}_2$ MQDs (alone)                             | 4.68                              |
| 2      | $\text{Ti}_3\text{C}_2$ MQDs ( $\text{Ti}_3\text{C}_2$ MQDs/CDs) | 3.37                              |
| 3      | CDs (alone)                                                      | 2.25                              |
| 4      | $\text{Ti}_3\text{C}_2$ MQDs ( $\text{Ti}_3\text{C}_2$ MQDs/CDs) | 3.48                              |

**Table S2** Comparison of different fluorescence detection methods for CV

| Methods      | Linear range           | Detection limit | Ref.      |
|--------------|------------------------|-----------------|-----------|
| Fluorescence | 0.02-1.6 $\mu\text{M}$ | 7.3 nM          | [1]       |
| Fluorescence | 0.3-12 $\mu\text{M}$   | 83 nM           | [2]       |
| Fluorescence | 0.182-37 $\mu\text{M}$ | 61 nM           | [3]       |
| Fluorescence | 0.1-11 $\mu\text{M}$   | 20 nM           | [4]       |
| Fluorescence | 0.02-2.0 $\mu\text{M}$ | 8.6 nM          | This work |

## References

- [1] Y. Hu, Z. Gao, Yellow emissive Se, N-codoped carbon dots toward sensitive fluorescence assay of crystal violet, *J Hazard. Mater.*, 2020, 388, 122073.
- [2] K. Yi, A Novel Method for the Quantitative Determination of Crystal Violet Utilizing YVO<sub>4</sub>:Eu<sup>3+</sup> Nanoparticles, *Chem. Lett.*, 2017, 46, 520-523.
- [3] Y. Han, Y. Chen, J. Liu, et al. Room-temperature synthesis of yellow-emitting fluorescent silicon nanoparticles for sensitive and selective determination of crystal violet in fish tissues, *Sens. Actuator B-Chem.*, 2018, 263, 508-516.
- [4] D. Zhao, X. Liu, Z. Zhang, et al. Synthesis of Multicolor Carbon Dots Based on Solvent Control and Its Application in the Detection of Crystal Violet, *Nanomaterials (Basel)*, 2019, 9, 11.
